# Supplementary material for: Iron and copper complexes with antioxidant activity as inhibitors of the metastatic potential of glioma cells
Source: Royal Society of Chemistry journal article supplement (doi:10.1039/d0ra00166j), 2020-01-01
Supplement: d0ra00166j1.pdf [file d0ra00166j1.pdf]

1 Iron and copper complexes with antioxidant activity as inhibitors of the  
2 metastatic potential of glioma cells

3  
4 Joana F. Guerreiro<sup>†1,2</sup>; Marco Antônio G. B. Gomes<sup>†1</sup>; Francesca Pagliari<sup>1\*</sup>; Jeannette Jansen<sup>1,3</sup>;  
5 Maria G. Marafioti<sup>1</sup>; Clelia Nistico<sup>1</sup>; Rachel Hanley<sup>1,3</sup>; Rafael O. Costa<sup>4</sup>; Sarah S. Ferreira<sup>5</sup>; Filipa  
6 Mendes<sup>2</sup>; Christiane Fernandes<sup>6</sup>; Adolfo Horn Jr. <sup>6</sup>; Luca Tirinato<sup>1,7</sup>; Joao Seco<sup>1,3\*</sup>

7  
8 <sup>1</sup>Biomedical Physics in Radiation Oncology, German Cancer Research Center (DKFZ), Im Neuenheimer Feld 223, 69120 Heidelberg,  
9 Germany.

10 <sup>2</sup>Departamento de Engenharia e Ciências Nucleares e Centro de Ciências e Tecnologias Nucleares, Instituto Superior Técnico,  
11 Universidade de Lisboa, Estrada Nacional 10 (km 139.7), 2695-066 Bobadela LRS, Portugal.

12 <sup>3</sup>Department of Physics and Astronomy, Heidelberg University, Im Neuenheimer Feld 227, 69120 Heidelberg, Germany

13 <sup>4</sup>Laboratório de Ciências Química, Universidade Estadual do Norte Fluminense (UENF), Av. Alberto Lamego, 2000, Campos dos  
14 Goytacazes, RJ, 28013602, Brazil.

15 <sup>5</sup>Instituto Federal Fluminense (IFF), R. Dr. Siqueira, 273, Campos dos Goytacazes, RJ CEP 28030-130, Brazil.

16 <sup>6</sup>Departamento de Química, Universidade Federal de Santa Catarina (UFSC), Campus Universitário Trindade - 88040900  
17 Florianópolis-SC, Brazil.

18 <sup>7</sup>BioNEM Laboratory, Department of Experimental and Clinical Medicine, Magna Graecia University of Catanzaro, 88100 Catanzaro,  
19 Italy

20 .  
21 †Equally contributing authors

22 \*Corresponding authors: Tel.: +49 6221 42 2554; email: f.pagliari@dkfz-heidelberg.de/j.seco@dkfz-heidelberg.de

23  
24 **Abstract**

25 Gliomas are the most common type of primary brain tumors, presenting high mortality and  
26 recurrence rates that highlight the need for the development of more efficient therapies. In that  
27 context, we investigated iron(III) (FeL) and copper(II) (CuL) complexes containing the tetradentate  
28 ligand 2-[[[(3-chloro-2-hydroxy-propyl)-pyridin-2-ylmethyl-amino]-methyl]-phenol (L) as potential  
29 antimetastatic compounds in glioma cells. These complexes were designed to act as mimetics of  
30 antioxidant metalloenzymes (catalases and superoxide dismutase) and thus interfere with  
31 production of reactive oxygen species (ROS), important signaling molecules that have been linked  
32 to the induction of Epithelial–Mesenchymal Transition (EMT) in cancer cells, a process associated  
33 with cancer invasion and aggressiveness. The results obtained have revealed that, *in vitro*, both  
34 compounds act as superoxide dismutase or catalase mimetics, and this translated in glioma cells  
35 into a decrease in ROS levels in FeL-treated cells. In addition, both complexes were found to  
36 inhibit the migration of monolayer-grown H4 cells and lead to decreased expression of EMT  
37 markers. More importantly, this behavior was recapitulated in 3D spheroids models, where CuL  
38 in particular was found to completely inhibit the invasion ability of glioma cells, with or without

39 cellular irradiation with X-rays, which is suggestive of these compounds' potential to be used in  
40 combination with radiotherapy. Overall, the results herein obtained describe the novel use of  
41 these complexes as agents that are able to interfere with regulation of EMT and the invasive  
42 behavior of glioma cells, an application that deserves to be further explored.

43

#### 44 **Introduction**

45 The most common primary malignant brain tumors in adults are gliomas, which correspond to  
46 about 80% of all the malignant brain tumors diagnosed<sup>1</sup>. The treatment of gliomas varies  
47 according to the degree of the disease and the patient's condition, but the current standard of  
48 treatment includes surgery for maximum resection of the tumor, followed by radiotherapy and  
49 chemotherapy<sup>1</sup>. However, achieving complete resection of the tumor is often impossible due to  
50 its highly infiltrating nature and inaccessible location, leading to recurrence of the disease in the  
51 great majority of cases<sup>1</sup>. In addition, while metastases outside of the central nervous system are  
52 uncommon, when present, they often exhibit increased resistance to treatment, similarly to what  
53 is observed for relapsed tumors, leading to a very poor prognosis for these patients<sup>1-3</sup>. As such,  
54 it is necessary to develop more efficient therapeutic tools that can improve the patients' outcome.  
55 Research exploring metal based compounds as chemotherapeutic drugs for the treatment of  
56 cancer has increased since the discovery of cisplatin-based chemotherapy<sup>4, 5</sup>. Metal complexes  
57 present many versatile characteristics, such as their redox activity, diverse reactivity with organic  
58 substrates, and different coordination modes that make them attractive tools to be explored in the  
59 design of new chemotherapeutic drugs<sup>4, 5</sup>. In addition to the development of cytotoxic  
60 chemotherapeutic drugs, the interest on metal complexes that can be used as metastasis  
61 inhibitors has also increased in recent years<sup>5-7</sup>. For this purpose, most of the studies done so far  
62 have largely been focused on promising ruthenium-based compounds<sup>6, 8-10</sup>, even though  
63 complexes containing other metals have also been described<sup>11, 12</sup>. Currently, however, only two  
64 ruthenium compounds have advanced into clinical trials, although they've failed to show the  
65 desired therapeutic efficacy that would make them viable alternative to the therapies currently in  
66 use<sup>13</sup>.

67 Antimetastatic complexes can target different cellular pathways or processes, but have mainly  
68 been designed to modulate or interfere with key features necessary for cancer migration or  
69 invasion. One such feature is the modulation of the Epithelial–Mesenchymal Transition (EMT)  
70 phenomenon<sup>9</sup>, a physiological process involved in the cellular developmental program and tissue  
71 repair, but which has been also strongly linked to the metastatic process in cancer<sup>14</sup>. Namely,  
72 during EMT, cancer cells undergo a series of changes (biochemical, morphologic and genetic)

73 that allow them to have a more mesenchymal-like phenotype that is thought to be necessary to  
74 promote cancer cell migration and invasion, and their escape from the primary tumor<sup>14</sup>. Despite  
75 the fact that the search for compounds able to interfere with the EMT process has been increasing  
76 in the past years, it is still mainly based in the use of natural compounds isolated from plants<sup>15</sup>,  
77 while the use of metal-based compounds in this branch of medicinal chemistry remains poorly  
78 researched. In addition to targeting EMT, several of these metal-based compounds also aim to  
79 affect Reactive Oxygen Species (ROS) equilibrium<sup>8, 11, 12, 16</sup> since ROS can act as signaling  
80 molecules in many cellular pathways, including those involved in tumor progression<sup>17</sup>.  
81 Interestingly, the EMT process seems to be connected to cellular ROS levels and different metals  
82 have been shown to induce EMT in different cancers through a ROS-dependent mechanism<sup>18-21</sup>.  
83 As such, modulation of ROS levels in cancer cells has been put forth as another promising  
84 strategy to tackle the problem of local invasiveness and metastization of cancer<sup>22</sup>.  
85 One possible strategy to modulate the levels of cellular ROS, and, consequently, the cancer cells  
86 metastatic ability, is the use of metal-based compounds that mimic the superoxide dismutase  
87 (SOD) and catalase (CAT) enzymes, important cellular antioxidant proteins that are responsible  
88 for maintaining the cellular redox balance<sup>22</sup>. For that purpose, in this work, we used two  
89 coordination compounds harboring the ligand 2-[(3-chloro-2-hydroxy-propyl)-pyridin-2-ylmethyl-  
90 amino-methyl]-phenol (L) complexed with iron (FeL)<sup>23, 24</sup> and copper (CuL)<sup>25</sup>. We thus describe  
91 for the first time the application of these compounds in the frontier of chemistry and human  
92 oncology, by assessing their antioxidant and antimetastatic potential in glioma (H4) cells. The  
93 results obtained have revealed an impressive ability of the compounds under study to inhibit the  
94 migration of H4 glioma cells in both 2D and 3D cellular models. In addition, this effect was  
95 maintained after irradiation with X-rays, suggesting that these compounds might be suitable to be  
96 used as co-adjuvants for radiotherapeutic treatments.

97  
98  
99

## 100 **Results and discussion**

101

### 102 **Cytotoxicity of FeL and CuL compounds in H4 glioma cells.**

103 The synthesis of the ligand 2-[(3-chloro-2-hydroxy-propyl)-pyridin-2-ylmethyl-amino]-  
104 methyl-phenol (L) and of the iron and copper complexes studied here were described previously  
105 by us<sup>23-26</sup>. The ligand contains four coordinating groups (N<sub>2</sub>O<sub>2</sub>) and its coordination behavior  
106 depends on the metal center. For example, it forms dinuclear phenoxo bridge complexes with  
107 Ni(II)<sup>27</sup>, while with Fe(III), mononuclear and dinuclear (alkoxo bridge) were already described<sup>23,</sup>  
108 <sup>24</sup>. The iron compound described here shows a dinuclear structure (Figure 1), in which the iron(III)  
109 ions are connected by two alkoxo bridges from two ligand molecules. The coordination  
110 environment is completed by two nitrogen atoms (the tertiary N atom and one from the pyridyl  
111 group), one oxygen from the phenolate unit and a water molecule. It has been shown that this  
112 compound is able to promote DNA cleavage<sup>23</sup>. Concerning the copper complex, its molecular  
113 structure solved by monocrystal x-ray analysis showed the presence of two distinct species in the  
114 crystal, a mononuclear and a dinuclear one<sup>25</sup>, shown in Figure 1. The dinuclear species may be  
115 considered the dimer of the mononuclear one and studies showed that the dinuclear species is  
116 transformed in the mononuclear one in solution, and, therefore, only the mononuclear species  
117 remains. It has been previously demonstrated that the copper complex shows cytotoxicity on  
118 pathogenic bacteria<sup>25</sup>.

119 In order to determine if the FeL and CuL complexes (Figure 1A) exhibited significant  
120 antitumoral properties, their cytotoxic activity after 24 hours (h) of treatment was determined in  
121 H4 glioma cells using the AlamarBlue assay. Both compounds were found to have IC<sub>50</sub> values in  
122 the high micromolar range ( $85 \pm 1$  and  $82 \pm 1$   $\mu$ M for FeL and CuL, respectively; Supplementary  
123 Figure 1), indicating that they display only moderate cytotoxicity in glioma cells. In fact, these  
124 compounds exhibited about 40% less cytotoxicity than the one previously reported for the  
125 reference chemotherapeutic drug cisplatin (50  $\mu$ M) in this same cancer cell line after 24 h of  
126 incubation<sup>28</sup>. Since we were not interested in evaluating the intrinsic cytotoxic activity of the  
127 compounds, but how their antioxidant activity may influence other properties of cancer cell  
128 development, the lack of cytotoxic effect is of relevance for the present study. As such, we  
129 selected a concentration of the compounds that did not induce significant loss of viability (25  $\mu$ M;  
130 Figure 1B) to further proceed with the evaluation of these compounds as antimetastatic agents,  
131 while minimizing potential interference from cytotoxic effects exerted by the drugs. Due to the  
132 lack of a proper non-malignant control brain cell line, this study did not consider the effects of the  
133 tested compounds on healthy brain cells. Although we acknowledge that this aspect can be of

134 particular interest, it is currently beyond the scope of this study and, therefore, it will be further  
135 investigated in the future.

136 Stability studies by UV-Vis spectrometry indicated that both compounds were stable at the  
137 selected concentration in a PBS solution at physiological pH for up to 72 h of incubation (Figure  
138 1C), the latest time point used for our assays. For the iron compound, it was also possible, using  
139 a higher concentration of FeL (50  $\mu$ M), to visualize through confocal fluorescence microscopy the  
140 presence of a fluorescent species in the lysosomes, suggesting that it was indeed entering the  
141 cells under these conditions (Supplementary Figure 2). On the other hand, no signal was  
142 observed for the copper compound.

143

### 144 ***In vitro* and cellular antioxidant properties of FeL and CuL**

145 Based on the important role that transition metal ions play in cellular redox mechanisms,  
146 several studies having metalloenzymes, such as SOD and CAT, as targets for new mimetic  
147 compounds have been performed<sup>29-32</sup>. Within this approach, in recent years, our group has  
148 developed different ligands and their respective coordination compounds with different transition  
149 metals, that exhibit antioxidant properties<sup>29, 33-35</sup>. For example, we have shown that copper, iron  
150 and manganese complexes with the ligand 1-[bis(pyridin-2-ylmethyl) amino]-3-chloropropan-2-ol  
151 (L1), similar to the one reported here, but with two pyridine groups instead of a pyridine and a  
152 phenol group, present protective antioxidant effects on *Saccharomyces cerevisiae* cells subjected  
153 to oxidative stress<sup>33</sup>. These results thus prompted us to investigate the antioxidant activity of this  
154 set of compounds (FeL and CuL) and evaluate if their antioxidant activity could exert any influence  
155 on biological processes, particularly on the migratory ability of cancer cells.

156 To address if the compounds FeL and CuL displayed antioxidant activities, we first  
157 assessed their ability to mimic the SOD enzyme *in vitro*. Both compounds reacted with the  
158 superoxide anion (Supplementary Figures 3 and 4 and Table 1) as evidenced by the IC<sub>50</sub> values  
159 obtained, which represent the concentration of the compound required to inhibit half of the  
160 reduction of nitrobluetetrazolium (NBT) by the superoxide anion generated *in situ* at a constant  
161 rate by the enzymatic system xanthine/xanthine oxidase, in comparison to control conditions.

162 In order to show SOD-like activity, the compounds have to be able to promote the oxidation  
163 ( $O_2^{\cdot-} \rightarrow O_2 + e^-$ ) and the reduction ( $O_2^{\cdot-} + e^- \rightarrow O_2^{2-}$ ) of the superoxide anion. This behavior is  
164 shown by systems that catalytically induce the superoxide decomposition. If the system promotes  
165 only the reduction or only the oxidation of the superoxide anion, they will work as superoxide  
166 reductase or superoxide oxidase, respectively. In light of this, the compounds described here  
167 would react only stoichiometrically with the superoxide anion. Thus, considering the difference

168 (71 nmol) between the number of moles of formazan formed in the presence and in the absence  
 169 of CuL and the number of moles of the copper complex (2.0 nmol) employed in the assay that  
 170 showed the lower formation of formazan (Figure SM1 supplementary material), each molecule of  
 171 the copper complex was able to react with 35 molecules of superoxide anion after 40 min, clearly  
 172 suggesting catalytic activity. On the other hand, since the iron complex was less active, the  
 173 reaction ratio superoxide:FeL was only 1.5 after 40 min. Since this ratio is only a little bit higher  
 174 than the stoichiometric reaction, at the moment it is not possible to conclude if FeL showed SOD  
 175 or SOO activity. Therefore, CuL was found to possess a higher reactivity on the superoxide anion  
 176 (almost 50 times higher) than the FeL compound and due to its catalytic activity it might be  
 177 considered as presenting SOD-like activity. However, the  $k_{cat}$  obtained for CuL is *ca.*  $1.8 \times 10^2$  lower  
 178 than the one observed for the natural SOD. Comparing the data with the complexes synthesized  
 179 with the ligand L1 (Table 1), the activities obtained here were of the same order of magnitude.

180 Next, the ability of the complexes to mimic the enzyme CAT was evaluated through a  
 181 direct reaction with hydrogen peroxide ( $H_2O_2$ ), which was monitored by measuring  $H_2O_2$   
 182 absorption using electronic spectroscopy at 240 nm. The FeL complex showed CAT mimetic  
 183 activity in phosphate buffer solution (pH 7.8), while the CuL complex exhibited CAT-like activity  
 184 only when one co-catalyst (piperazine) was added to the reaction (Table 1). Once again, the  
 185 kinetic parameters calculated for both compounds, in particular the  $k_{cat}$ , revealed that CuL  
 186 possesses higher CAT-like activity than FeL, albeit limited by the need of the addition of the  
 187 mentioned co-catalyst.

188 **Table 1:** Kinetic parameters of iron and copper complexes FeL, CuL and natural SOD and CAT  
 189 enzymes.

| Compound                    | SOD activity                   |                                 | CAT activity              |               |                                     | Ref.                         |
|-----------------------------|--------------------------------|---------------------------------|---------------------------|---------------|-------------------------------------|------------------------------|
|                             | IC <sub>50</sub><br>( $\mu$ M) | $k_{cat}$<br>( $M^{-1}s^{-1}$ ) | $k_{cat}$<br>( $s^{-1}$ ) | $K_M$<br>(mM) | $k_{cat}/K_M$<br>( $M^{-1}s^{-1}$ ) |                              |
| FeL <sup>a</sup>            | 8.946±0.345                    | $1.43 \times 10^5$              | 0.080±0.003               | 23.2±1.2      | 3.45±0.04                           | This work                    |
| CuL                         | 0.181±0.016                    | $7.07 \times 10^6$              | 0.360±0.125               | 41.9±15.7     | 8.25±0.06                           | This work                    |
| FeL1                        | 26.8±2.5                       | $1.2 \times 10^5$               | ND                        | ND            | ND                                  | Ribeiro et al. <sup>33</sup> |
| CuL1                        | 0.43±0.2                       | $7.7 \times 10^6$               | NA                        | NA            | NA                                  | Riberio et al. <sup>33</sup> |
| Cu, Zn-SOD                  | 0.03                           | $1.3 \times 10^9$               | -                         | -             | -                                   | Weser et al. <sup>38</sup>   |
| CAT<br>(Human erythrocytes) | -                              | -                               | $5.87 \times 10^5$        | 80            | $7.34 \times 10^6$                  | Switala et al. <sup>39</sup> |

190 <sup>a</sup> The kinetic data do not allow to confirm if the compound shows superoxide dismutase or superoxide oxidase activity.  
191 L = N-(2-hydroxybenzyl)-N-(2-pyridylmethyl)[(3-chloro)(2-hydroxy)] propylamine; L1 = 1-[bis(pyridin-2-ylmethyl) amino]-3-  
192 chloropropan-2-ol; ND = not determined; NA = not active  
193

194  
195           Following the results obtained with the *in vitro* enzymatic assays, we then proceeded to  
196 determine the ROS levels in H4 glioma cells incubated with the 2 complexes. For that, we used  
197 CM-H<sub>2</sub>DCFDA-based flow cytometry which is useful to detect several ROS species, but mainly  
198 H<sub>2</sub>O<sub>2</sub>, the hydroxyl radical (OH<sup>•</sup>) or peroxyxynitrite<sup>40</sup>. Cellular treatment with FeL for 24h induced a  
199 statistically significant reduction in ROS levels (Figure 2A). In contrast, CuL led to an evident, but  
200 not statistically significant, decrease in ROS levels (Figure 2A). These results indicate that the *in*  
201 *vitro* antioxidant activity is not translated in the cellular environment. This behavior has been  
202 described previously when the *in vitro* SOD/CAT activity of Fe, Cu and Mn of similar mimetic  
203 complexes was not replicated in live cells<sup>33</sup>.

204           To assess if the complexes antioxidant effects might also be due to indirect instead of  
205 direct effects, we assessed the level of expression of several ROS-related genes by qPCR. The  
206 vehicle control sample, treated with DMSO, exhibited a clear effect on the expression of some of  
207 the genes analysed (Figure 2B), which is in agreement with the fact that DMSO has been  
208 previously described to be a ROS scavenger, able to interfere with several related cellular  
209 processes<sup>41</sup>, even if under our experimental conditions we saw no significant changes in ROS  
210 levels in DMSO-control cells in the cytometric study (Figure 2A). From the results obtained,  
211 however, it became evident that both treatment with FeL and CuL led to a considerable  
212 upregulation of the expression of thioredoxin (Figure 2B), Trx1, an important cytosolic detoxifying  
213 protein<sup>42</sup>, which suggests that these compounds might have an impact on the homeostasis of  
214 cytosolic redox status. Additionally, the FeL compound also led to significant changes in SOD1  
215 and CAT expression levels when compared with DMSO-treated cells (Figure 2B), which is in  
216 accordance to the fact that it induced a significant decrease in ROS levels (Figure 2A) and might  
217 contribute to its apparently higher antioxidant effect when compared with CuL. In addition to  
218 having an effect on intracellular ROS levels, we cannot rule out the possibility that the complexes  
219 used are also altering extracellular ROS levels. These species have been hypothesized to be  
220 extremely relevant players in the tumor microenvironment and different aspects of cancer  
221 progression, including the development of metastasis<sup>43</sup>, and, as such, this possibility is worthy of  
222 further investigation in the future.

223  
224 **FeL and CuL complexes reduce migration through inhibition of Epithelial–Mesenchymal**  
225 **Transition (EMT) in glioma cells**

226 Since an increase in ROS had been previously implicated in EMT induction in different  
227 cells<sup>18-21</sup>, we hypothesized that the reduction in ROS levels induced by the compounds could be  
228 leading to changes in the metastatic ability of H4 cells. The effect of FeL and CuL on the migration  
229 of H4 cells was thus investigated by the transwell migration assay. The number of cells migrated  
230 to the bottom of the membrane revealed that both complexes can clearly inhibit the migratory  
231 ability of H4 cells (Figure 3A).

232 To investigate to what extent this observation was related to cell proliferation or cell cycle arrest  
233 induction, since ROS has also been shown to be related with regulation of cellular proliferation/cell  
234 cycle<sup>44</sup>, the effects of the compounds on the cell cycle of H4 cells were investigated by flow  
235 cytometry. While FeL showed no effect on the cell cycle of H4 cells, CuL induced a significant  
236 decrease in the G0/G1 phase of the cycle ( $*p \leq 0.05$ ), with a concomitant increase in the % of  
237 cells in the S and G2/M phases (of about 7.7 and 6.2%, respectively) that was, however,  
238 statistically not significant (Figure 3B). This suggests that CuL-treated cells might experience a  
239 shift in the cell cycle from the G0/G1 phase to the S and G2/M phases, which could either reflect  
240 a slight increase in proliferation, or that cells are arrested during DNA duplication or prior to cell  
241 division<sup>45</sup>. However, this difference does not seem likely to justify the significant change observed  
242 in the migration of glioma cells upon exposure to the complex.

243 As such, looking for another possible explanation, we next analyzed the expression of several  
244 EMT markers in the FeL/CuL treated cells by qPCR. The results evidenced that treatment with  
245 the compounds is accompanied by an obvious and statistically significant increase in expression  
246 of E-cadherin mRNA, and a slight, but not significant, reduction of Vimentin in the case of CuL  
247 (Figure 3C). The expression of the EMT-related transcription factor Snail was found to also be  
248 statistically significantly decreased upon treatment with CuL (Figure 3C). This gene expression  
249 profile is consistent with the hypothesis that cells treated with FeL and CuL had a more epithelial-  
250 like phenotype, possibly experiencing an inhibition of the EMT transition process, which should  
251 originate cells with a less motile phenotype<sup>14</sup>, and is in accordance with the decreased migratory  
252 ability observed in complex-treated cells (Figure 3A), demonstrating that the compounds do seem  
253 to possess anti-metastatic properties.

254

### 255 **FeL and CuL complexes inhibit 3D spheroids invasion**

256 There is mounting evidence that the results obtained in 2D cellular models, where many  
257 of the characteristics of the original tumor microenvironment are missing, present several  
258 limitations when being transposed into the clinical setting<sup>46</sup>. In that context, several 3D cellular  
259 models have been developed that present a level of complexity which is much closer and more



260 representative of several aspects of tumor tissues than the ones shown by monolayer cell  
261 cultures<sup>46</sup>. In particular, matrix-embedded 3D cultures have been increasingly applied to  
262 investigate tumor migration and invasion<sup>47</sup>.

263 As such, and in order to try to better estimate the clinical translational potential of the  
264 compounds under evaluation, we extended our studies to H4 multicellular spheroids, which are  
265 expected to better recapitulate *in vivo* tumor properties. For that purpose, spheroids generated in  
266 agarose-coated plates were first treated with FeL or CuL for 24 h or 72 h. Then, cell viability was  
267 assessed using the CellTiter-Glo® 3D assay, while spheroid size and growth were accompanied  
268 using bright field microscopy. Surprisingly, incubation with FeL increased cellular viability (Figure  
269 4A), both after 24 h and 72 h of incubation. This increase in viability was accompanied by an  
270 increase in spheroid size after 72 h of incubation (Figure 4B). In contrast, CuL induced a decrease  
271 in viability as early as 24 h of incubation, along with a concomitant decrease in spheroid size  
272 (Figure 4A and 4B).

273 Next, we observed that both complexes were able to interfere with the invasive behavior  
274 exhibited by H4 cells embedded in matrigel (Figure 4C). CuL, in particular, exhibited very  
275 encouraging results, completely eliminating H4 cell ability to invade the matrigel matrix, an effect  
276 that cannot be attributed solely to the decrease in viability and growth found to occur following  
277 incubation with this compound (around 31% and 19% in terms of cellular viability and growth,  
278 respectively). FeL also displayed the ability to inhibit the invasive behavior of H4 cells, an effect  
279 that was, however, not as striking as the one found for CuL. However, this can be due to the fact  
280 that this compound was found to present a stimulatory effect in cellular viability, as described  
281 above (Figure 4A and 4B), counteracting the desirable effect it seemed to also have as an anti-  
282 metastatic compound.

283 Notably, the effect of the compounds on H4 spheroids' invasive ability was maintained even  
284 when cells were irradiated with X-rays (6 Gy). This is highly relevant in the clinical context, since  
285 it has been demonstrated that the use of low linear energy transfer (LET) irradiation, which  
286 includes X-rays radiation, might, in patient-specific contexts, increase migration and invasion of  
287 glioma cells<sup>48</sup>. In addition, most glioma relapses occur in an area within 2 cm of the area where  
288 the primary tumor initially developed, which impairs tumor removal and local radiotherapy<sup>2</sup>. The  
289 results obtained in the 3D invasion assays thus clearly demonstrate that both complexes possess  
290 an anti-metastatic effect not only in monolayer cells, but also in the more representative spheroids  
291 model that has potential to be highly relevant in the clinical context.

292

293 **FeL and CuL complexes alter glutathione metabolism or oxidative stress in H4 spheroids.**

294            Since we had previously observed an apparent decrease in ROS levels in complex-treated  
295 cells that could be related to the decreased migration observed in monolayer-cultured cells, we  
296 investigated whether the remarkable effect of the compounds on the inhibition of H4 spheroids'  
297 invasion in matrigel could be also related with changes in cellular oxidative stress in this 3D  
298 cellular model. For that, the antioxidant ability of the complexes was assessed by determining the  
299 relative levels of cellular glutathione and the ratio of reduced glutathione (GSH), an important  
300 cellular antioxidant and detoxifying agent, and oxidized glutathione (GSSG) using the  
301 GSH/GSSG-Glo™ Assay. The results obtained revealed that treatment with FeL induced an  
302 increase in GSH levels, while the GSH/GSSG ratio remained unchanged (Figure 5A and 5B,  
303 respectively). This suggests that this compound did not change the oxidative stress levels in H4  
304 spheroids, but it seemed to affect cellular glutathione metabolism. Contrastingly, cells treated with  
305 the CuL complex showed an evident decrease of the GSH/GSSG ratio, compared with the vehicle  
306 control sample, which indicates that CuL was inducing oxidative stress under these conditions  
307 (Figure 5B). In addition, the level of total GSH in these cells was also found to be reduced (Figure  
308 5A).

309            These observations raise the question of what might be the impact of such metabolic changes  
310 on the behavior observed for FeL- and CuL-treated H4 spheroids. One possibility is that the  
311 elevated oxidative stress found in CuL-treated cells could underlie the decrease in viability  
312 observed under these same conditions (Figure 4A and 4B), since several metal-based  
313 compounds have been previously described to reduce cancer cell viability through the induction  
314 of ROS production<sup>8, 11, 12</sup>. Moreover, increased GSH levels have also been previously correlated  
315 with enhanced cancer metastatic ability<sup>49</sup>. This could, at least partially, explain the difference in  
316 performance observed for the FeL and CuL compounds, since the later significantly decreases  
317 GSH levels and is much more efficient at reducing the invasive potential of H4 spheroids, while  
318 the former actually increased the GSH levels, exhibiting a less pronounced inhibitory effect.  
319 Overall, these results are highly encouraging, since modulation of GSH levels have been  
320 proposed as a potential way to sensitize tumor cells to treatment modalities such as  
321 chemotherapy<sup>49</sup>, and, in particular the CuL complex, seems to be a good candidate to test this  
322 goal, while also having been proved herein to have a significant impact on the cell invasive ability.

## 323 324 **Conclusion** 325

326            The highly infiltrative nature of gliomas poses significant therapeutic challenges that result in a  
327 high rate of disease recurrence and poor patient prognosis. In this work, we explored the  
328 application of two coordination compounds, FeL and CuL in an anticancer therapeutic context.

329 Both complexes showed antioxidant activity (catalase and superoxide dismutase/superoxide  
330 oxidase) *in vitro* and, in the case of FeL, also in H4 glioma cells. Although the complexes did not  
331 present significant cytotoxic activity at 25  $\mu$ M, they exhibited anti-migratory properties in 2D  
332 cultures and anti-invasive abilities in 3D multicellular spheroids. While the mechanisms underlying  
333 these effects have not been fully elucidated, they seem to be related with cellular oxidative stress  
334 and/or glutathione metabolism, particularly in 3D cellular models where the best performing  
335 complex, CuL, caused a reduction in GSH levels, which has been previously correlated with  
336 increased metastatic properties of cancer cells. Importantly, the concentrations of the compounds  
337 tested were not cytotoxic in 2D models or only slightly affected the viability in 3D models, which  
338 indicates that the occurrence of extensive cell death is not behind the changes in  
339 migratory/invasive ability. Additionally, this suggests that they might also be less toxic to healthy  
340 cells, which would result in less treatment side-effects. Considering that recent reports have also  
341 proposed that glioma therapy needs to be developed in the context of a potential detrimental  
342 enhancement of cancer invasion by radiotherapeutic treatments, our complexes also revealed a  
343 decrease in H4 cells invasion when combined with irradiation with x-rays. This is highly relevant,  
344 as it indicates that they do have high potential to limit the cancer invasive ability and might be  
345 used in combination with other anti-proliferative therapies.

346

## 347 **Experimental Section**

348

### 349 **Synthesis of complexes, preparation of stock solutions and stability**

350 The ligand 2-[[3-chloro-2-hydroxy-propyl)-pyridin-2-ylmethyl-amino]-methyl]-phenol (L) and the  
351 complexes FeL and CuL used in this work (Figure 1) were synthesized and characterized as  
352 described previously.<sup>23-25</sup>. Elemental analyses (CHN) and ESI-(+)-MS confirmed the identity and  
353 purity of the compounds.

354 A 1.0 mM stock solution of each complex was prepared by dissolving it in a 5% solution of  
355 dimethylsulfoxide (DMSO) prepared in ultrapure MilliQ water (H<sub>2</sub>O). For biological experiments,  
356 solutions with the desired concentrations were prepared by diluting the compound's stock in the  
357 culture medium used. The stability of the compound's solutions was determined in Dulbecco's  
358 Phosphate-Buffered Saline (DPBS) (Gibco™, Thermo Fisher Scientific, Waltham, MA, USA) at  
359 physiological pH. For that, a solution of the compounds at a concentration of 25  $\mu$ M was prepared  
360 and the UV-Vis spectrum of the solutions was obtained at different times (0, 24, 48 and 72 h) in  
361 a UV-Vis Spectrophotometer (Varian Cary 400).

362

363 **Cell culture**

364 Human brain neuroglioma (H4) cells (ATCC, Manassas, VA, USA) were grown in Dulbecco's  
365 Modified Eagle's Medium (DMEM) supplemented with 10% Fetal Bovine Serum (FBS) and 1%  
366 Penicillin/Streptomycin (all from Gibco™, Thermo Fisher Scientific). The cell line was cultured  
367 continuously as a monolayer at 37°C and 5% of CO<sub>2</sub>.

368

369 **Viability Assays**

370 For IC<sub>50</sub> determination, H4 cells were seeded at a density of 1.0 x 10<sup>4</sup> cells in 150 µL of medium  
371 in a 96-well black polystyrene microplate (Corning, NY, USA) and allowed to attach for 24 h at  
372 37°C. Then, the medium was removed and the wells were washed with DPBS before the addition  
373 of 150 µL of the 200, 100, 50, 25 and 12.5 µM solutions of the complexes, the respective vehicle  
374 controls (DMSO at the same concentration than in the complexes' solutions), or fresh medium  
375 (untreated control sample) to the wells. After 24 h of incubation, the medium in each well was  
376 removed, the wells washed with DPBS and 150 µL of a 10% solution of AlamarBlue (Thermo  
377 Fisher Scientific) in medium were added to each well. The plate was covered with aluminum foil  
378 and incubated for 2 h at 37°C and subsequently read in a CLARIOstar® microplate reader (BMG  
379 LABTECH GmbH, Offenburg, Germany) for fluorescence detection.

380 For viability determination by flow cytometry, 7.0 x 10<sup>5</sup> cells were seeded in 75 cm<sup>2</sup> flasks (Greiner  
381 Bio-one, Frickenhausen, Germany) and incubated for 24 h at 37 °C. The medium was removed  
382 and cells were washed once with DPBS before 10.5 mL of fresh medium, medium with 25 µM of  
383 FeL and CuL, or medium with 0.125% of DMSO (as the vehicle control) were added to the flasks.  
384 The flasks were incubated for an additional 24 h, after which cells were detached and washed  
385 with DPBS. Then, for each sample, 1.0 x 10<sup>6</sup> cells were resuspended in DPBS and analyzed  
386 using a flow cytometer (BD FACS CANTO™ II) (unstained control samples). Then, those same  
387 cells were stained with 1 µg/mL of propidium iodide (PI) (Sigma Aldrich, St. Louis, MO, USA) and  
388 re-analyzed. The percentage of live cells calculated for each sample was normalized to the  
389 untreated control sample, and three independent experiments were performed.

390

391 **Fluorescence study by confocal microscopy**

392 H4 cells were seeded at a density of 5.0 x 10<sup>4</sup> cells on a 22-mm coverslip placed in a 6-wells plate  
393 (CELLSTAR®, Greiner Bio-One), and allowed to attach overnight. Cells were then incubated or  
394 not (as a control) with 50 µM of FeL for 24 h at 37 °C. Then, cells were washed once with Hank's  
395 Buffered Salt Solution (HBSS; Thermo Fisher Scientific) and stained with 75 nM Lyso-Tracker™

396 Red DND-99 (Molecular Probes, Thermo fisher Scientific) for 30 min at 37 °C. The staining  
397 solution was removed and cells were fixed for 5 min in 4% of paraformaldehyde at room  
398 temperature. Samples were washed thrice, coverslips were mounted on HBSS onto a glass slide,  
399 and sealed with nail polish. Fluorescence was visualized on a confocal microscope (Zeiss LSM  
400 710) using a standard DAPI filter for visualization of FeL fluorescence, while LysoTracker was  
401 visualized using a 561 nm laser for excitation followed by emission detection on the 566-691 nm  
402 range.

403

#### 404 **SOD/SOO-like activity**

405 The reactivity on the superoxide anion was evaluated by a methodology described previously,  
406 which involves the reduction of nitroblue tetrazolium (NBT) by the superoxide anion<sup>33</sup>. Stock  
407 solutions of xanthine, nitroblue tetrazolium (NBT) and xanthine oxidase were prepared at the  
408 concentrations of  $4.5 \times 10^{-4} \text{ mol.dm}^{-3}$ ,  $5.6 \times 10^{-5} \text{ mol.dm}^{-3}$  and  $0.2 \text{ U.cm}^{-3}$ , respectively, using a  
409  $0,05 \text{ mol.dm}^{-3}$  phosphate buffer solution at pH 7.8 (all reagents from Sigma-Aldrich).

410 A control solution containing 1000  $\mu\text{L}$  of the xanthine solution, 400  $\mu\text{L}$  of the phosphate buffer  
411 solution and 1000  $\mu\text{L}$  of NBT was added to a cuvette followed by the quick addition of 200  $\mu\text{L}$  of  
412 the xanthine oxidase solution and then the absorbance was measured over time in a UV-Vis  
413 spectrophotometer (Varian Cary 50), thus obtaining the rate of change of the absorption in the  
414 absence of the complex.

415 To evaluate the ~~SOD~~ activity of FeL and CuL, different concentrations of the complexes were  
416 employed: for FeL, the concentrations used were  $1.92 \times 10^{-6}$ ,  $3.85 \times 10^{-6}$ ,  $7.69 \times 10^{-6}$ ,  $1.15 \times 10^{-5}$ ,  
417 and  $1.54 \times 10^{-5} \text{ mol.dm}^{-3}$ ; for CuL, the concentrations used were  $9.62 \times 10^{-8}$ ,  $1.92 \times 10^{-7}$ ,  $3.85 \times$   
418  $10^{-7}$ ,  $5.77 \times 10^{-7}$  and  $7.67 \times 10^{-7} \text{ mol.dm}^{-3}$ . The concentration of the compounds which reduced  
419 50% of NBT in relation to the control experiment was calculated, obtaining the  $\text{IC}_{50}$ , which was  
420 then transformed to  $K_{\text{cat}}$  using the equation proposed by McCord and Fridovich,  $K_{\text{cat}} = K_{\text{NBT}} \times$   
421  $[\text{NBT}] / \text{IC}_{50}$ , where  $K_{\text{NBT}} = 5.94 \times 10^4 \text{ M}^{-1} \cdot \text{s}^{-1}$ .<sup>50, 51</sup>

422

#### 423 **CAT-like activity**

424 The ability of the compounds in promoting  $\text{H}_2\text{O}_2$  degradation was evaluated by the methodology  
425 described by Beers and Sizer<sup>52</sup>. Initially, the concentration of  $\text{H}_2\text{O}_2$  was evaluated by titration with  
426 iodide/thiosulfate<sup>53</sup>. To determine the CAT-like activity of FeL, solutions of  $\text{H}_2\text{O}_2$  at different  
427 concentrations ( $1.64 \times 10^{-2}$ ,  $1.23 \times 10^{-3}$ ,  $8.2 \times 10^{-3}$  and  $4.1 \times 10^{-3} \text{ mol.dm}^{-3}$ ) were prepared in a  
428 total volume of 2200  $\mu\text{L}$  of a phosphate buffer solution at pH 7.8. Then, each solution was mixed  
429 with a FeL solution yielding a final concentration of FeL of  $7.69 \times 10^{-5} \text{ mol.dm}^{-3}$ , and the decrease

430 of the absorbance associated with the reaction with H<sub>2</sub>O<sub>2</sub> was followed by UV-Vis spectroscopy  
431 at 240 nm (Varian Cary 50) in a 1 cm path length cell. For CuL, the above protocol was followed  
432 but the solutions were prepared on a piperazine solution (0.1 mol.dm<sup>-3</sup>) and the final CuL  
433 concentration in the mixture was 9.25 x 10<sup>-5</sup> mol.dm<sup>-3</sup>. The experiments were performed in  
434 triplicate, and the Michaelis Menten constant (K<sub>M</sub>) and the turnover number (K<sub>cat</sub>) were then  
435 calculated for each complex.

436

#### 437 **Intracellular ROS measurements**

438 For determination of intracellular ROS levels, H4 cells were prepared and incubated with the  
439 compounds (or respective medium and DMSO controls) as described above for the viability  
440 analysis by flow cytometry. Upon detaching and washing, 4.0 x 10<sup>5</sup> cells were incubated with 5  
441 μM of CM-H<sub>2</sub>DCFDA (Life Technology, Thermo fisher Scientific) in HBSS for 20 min at 37°C in  
442 the dark. Stained cells were then washed once and resuspended in DPBS. Samples were  
443 analyzed in a flow cytometer (BD FACS CANTO™ II) and the average fluorescence intensity of  
444 each sample was normalized to the untreated control sample.

445

#### 446 **Cell Cycle Assay**

447 For the cell cycle assay, cells were grown as described above for the viability determination by  
448 flow cytometry. After detaching and washing, 1.0 x 10<sup>6</sup> cells were fixed through drop by drop  
449 addition of 70% cold ethanol (v/v in DPBS) under gently vortexing. Samples were stored at 4°C  
450 for 24 h, centrifuged and the supernatant was removed. Subsequently, 250 μL of RNase A (10  
451 mg/mL in PBS; Sigma Aldrich) were added to each sample, which was then incubated at room  
452 temperature for 30 min and washed twice with DPBS. In the dark, each sample was stained with  
453 20 μg/mL of propidium iodide (PI) (eBioscience, Thermo Fisher Scientific) for 15 min before being  
454 analyzed using a flow cytometer (BD FACS CANTO™ II). Three independent experiments were  
455 performed.

456

#### 457 **q-PCR**

458 For RNA extraction, cells were prepared and incubated with the complexes (or respective medium  
459 and DMSO controls) as described above for the ROS determination and cell cycle analyses. Upon  
460 detaching and washing twice with DPBS, 1.0 x 10<sup>6</sup> cells were centrifuged, the supernatant was  
461 removed, and the pellet was stored at -20 °C until further use. Total RNA was extracted using the  
462 High Pure RNA isolation kit (Roche, Basel, Switzerland) according to the manufacturer's  
463 instructions. All the RNA samples were treated with DNase-1 to remove any contaminating

464 genomic DNA, and the purity of the RNA was checked spectroscopically in a NanoDropND-1000  
465 (NanoDrop Technologies). Then, 1 µg of purified RNA was reverse-transcribed using RT<sup>2</sup> First  
466 Strand Kit (Qiagen, Hilden, Germany) according to the manufacturer's instructions. Gene  
467 expression was assessed by real-time PCR using the cDNA obtained. For that, 25 ng of cDNA  
468 was amplified in 15 µl of a reaction mix containing Power SYBR Green PCR Master mix (Thermo  
469 Fisher Scientific), 20 pmol of each primer pair (Supplementary Table 1) and nuclease-free water.  
470 The thermal profile consisted of 1 cycle at 95 °C for 10 min followed by 40 cycles at 95 °C for 15  
471 s, 60 °C for 1 min. The human GAPDH cDNA fragment was amplified as the internal control. Data  
472 analysis was performed using the 2- $\Delta\Delta$ Ct method.

473

#### 474 **Transwell Migration Assay**

475 Cells starved overnight were detached and seeded onto cell culture inserts in 24-well plates  
476 (Millipore transwell PET filters, 8 µm pore; Merck, Kenilworth, NJ, USA) at a density of  $1.0 \times 10^4$   
477 cells in 150 µL of FBS-free medium, or FBS-free medium containing 0.125% DMSO, 25 µM of  
478 FeL or 25 µM of CuL. The lower transwell chambers were filled with 600 µL of media without FBS  
479 (negative control) or with medium containing 10% FBS. After 24h of incubation at 37 °C, the  
480 inserts were washed with DPBS, fixed with 4% paraformaldehyde, washed again, and stained  
481 with 1 µg/mL of Hoechst 33342 (Thermo Fisher Scientific) for 20 min at room temperature. Cells  
482 were then imaged using a 20x objective on a confocal microscope (Zeiss LSM 710). Seven  
483 random fields were photographed per insert, with at least two inserts being analyzed for each  
484 condition per experiment. The results shown were calculated based on three independent  
485 experiments.

486

#### 487 **Spheroids Viability Assay**

488 For spheroids formation,  $2.5 \times 10^3$  cells were seeded in 100 µL/well in 96-well plates coated with  
489 1.5% agarose (w/v in PBS). After 1 day of incubation, spheroids were fully formed, and 100 µL of  
490 fresh medium or medium with DMSO or the complexes was added to a final concentration of  
491 0.125% and 25 µM, respectively. Cells were incubated for 24 h or 72 h at 37 °C before cell viability  
492 was estimated using the CellTiter-Glo® 3D assay (Promega, Madison, WI, USA) according to the  
493 manufacturer's instructions. Luminescence was read in a CLARIOstar® microplate reader and  
494 the average luminescence of 8 spheroids per condition was normalized to the average  
495 luminescence of the untreated control sample, for at least two independent experiments.

496 In addition, spheroids' viability was also estimated based on spheroids' growth. For that, the total  
497 area of each spheroid was determined using the INSIDIA macro in FIJI<sup>54</sup>, and then normalized to

498 the area of the spheroid at day 0 (to account for possible differences in the spheroids' initial size)  
499 and to the size of the untreated spheroids at each time point (to assess the effect of the DMSO  
500 and the compounds on spheroids' growth). Several spheroids (at least 7) were analyzed per  
501 condition and time point, for at least two independent experiments.

502

### 503 **Spheroids Invasion Assay**

504 Each one-day old spheroid, formed as described above, was collected into a tube, washed once  
505 with FBS-free medium, and resuspended in 40  $\mu$ l of a 4.5 mg/ml Matrigel (Cat. Number 356231;  
506 Corning) solution in FBS-free medium. Then, each spheroid-containing suspension was spotted  
507 onto the centre of a well of a 24-well plate and incubated as a hanging drop for 1 h until the  
508 matrigel had polymerized. Complete medium, complete medium with 0.125% DMSO, or complete  
509 medium containing 25  $\mu$ M of the complexes were added and the spheroids were incubated for 24  
510 h at 37 °C before being irradiated (or not as a control) with 6 Gy X-rays on a Faxitron MultiRad225  
511 and further incubated at 37 °C. Images of spheroids and invading cells were acquired immediately  
512 after embedment and every 24h after that, using an Eclipse Ts2 microscope (Nikon). At each time  
513 point (24 h, 48 h, and 72 h) the total area of the spheroid and invading cells was determined as  
514 described above.

515

### 516 **Spheroids GSH/GSSG Assay**

517 Spheroids were formed and incubated with the compounds or respective controls as described  
518 above for the viability assessment. Then, the spheroids were carefully transferred to a white 96-  
519 wells polystyrene plate (Greiner Bio-One) and the media was aspirated. Total glutathione and the  
520 ratio of GSH/GSSG were then estimated using the GSH/GSSG-Glo™ Assay (Promega)  
521 according to the manufacturer's instructions with one minor change: after addition of the lysis  
522 buffer, the plate was shaken for 30 min to allow for proper lysis of the spheroids. Luminescence  
523 was then read in a CLARIOstar® microplate reader. Three spheroids were analyzed per day and  
524 condition, and the average luminescence of those spheroids was normalized to the average  
525 luminescence of the untreated control sample. Three independent experiments were performed.

526

### 527 **Statistics**

528 All data are shown as mean values  $\pm$  standard error of the mean (S.E.M.) of the DMSO-treated  
529 or complex treated samples relative to the untreated control. Statistical and data analysis was  
530 carried out using GraphPad Prism 6 software. Statistical differences between treatment and



531 control samples were assessed by one-way ANOVA or two-way ANOVA followed by Dunnett's  
532 test. The threshold for statistical significance was set to  $P = 0.05$ .

533

#### 534 **Conflicts of interest**

535 There are no conflicts to declare.

536

#### 537 **Acknowledgements**

538 This work was supported by *Coordenação de aperfeiçoamento de pessoal de nível superior*  
539 (CAPES-Brazil) through Project Probral CAPES-DAAD 88881.143979/2017-01. This work was  
540 also supported by the Department of Biomedical Physics in Radiation Oncology at the DKFZ.  
541 C<sup>2</sup>TN/IST authors gratefully acknowledge FCT support through the UID/Multi/04349/2019 and  
542 PTDC/BTM-TEC/29256/2017 projects.

543

#### 544 **References**

545

546

- 547 1. C. Alifieris and D. T. Trafalis, *Pharmacol Therapeut*, 2015, **152**, 63-82.
- 548 2. Q. Sun, R. Xu, H. B. Xu, G. M. Wang, X. M. Shen and H. Jiang, *World J Surg Oncol*, 2017, **15**.
- 549 3. J. Rosen, T. Blau, S. J. Grau, M. T. Barbe, G. R. Fink and N. Galldiks, *Case reports in oncology*, 2018,  
550 **11**, 591-600.
- 551 4. D. L. Ma, C. Wu, S. S. Cheng, F. W. Lee, Q. B. Han and C. H. Leung, *Int J Mol Sci*, 2019, **20**.
- 552 5. U. Ndagi, N. Mhlongo and M. E. Soliman, *Drug Des Dev Ther*, 2017, **11**, 599-616.
- 553 6. N. Muhammad and Z. Guo, *Current opinion in chemical biology*, 2014, **19**, 144-153.
- 554 7. A. Bergamo and G. Sava, *Chem Soc Rev*, 2015, **44**, 8818-8835.
- 555 8. B. Tang, D. Wan, S. H. Lai, H. H. Yang, C. Zhang, X. Z. Wang, C. C. Zeng and Y. J. Liu, *J Inorg Biochem*,  
556 2017, **173**, 93-104.
- 557 9. Y. H. He, H. Y. Xue, W. D. Zhang, L. Wang, G. Y. Xiang, L. Li and X. M. Shang, *J Organomet Chem*,  
558 2017, **842**, 82-92.
- 559 10. M. C. Ruiz, J. Kljun, I. Turel, A. L. Di Virgilio and I. E. Leon, *Metallomics : integrated biometal science*,  
560 2019, **11**, 666-675.
- 561 11. S. S. Gu, P. Yu, J. N. Hu, Y. N. Liu, Z. W. Li, Y. Qian, Y. Wang, Y. Gou and F. Yang, *Eur J Med Chem*,  
562 2019, **164**, 654-664.
- 563 12. B. Tang, D. Wan, Y. J. Wang, Q. Y. Yi, B. H. Guo and Y. J. Liu, *Eur J Med Chem*, 2018, **145**, 302-314.
- 564 13. J. P. C. Coverdale, T. Laroia-McCarron and I. Romero-Canelon, *Inorganics*, 2019, **7**.
- 565 14. E. D. Williams, D. Gao, A. Redfern and E. W. Thompson, *Nature reviews. Cancer*, 2019, DOI:  
566 10.1038/s41568-019-0213-x.
- 567 15. L. Avila-Carrasco, P. Majano, J. A. Sanchez-Tomero, R. Selgas, M. Lopez-Cabrera, A. Aguilera and  
568 G. G. Mateo, *Front Pharmacol*, 2019, **10**.
- 569 16. A. Sánchez-Mora, H. Valdés, M. T. Ramírez-Apan, A. Nieto-Camacho, S. Hernández-Ortega, D.  
570 Canseco-González and D. Morales-Morales, *Inorg Chim Acta*, 2019, **496**, 119061.
- 571 17. W. S. Wu, *Cancer Metast Rev*, 2006, **25**, 695-705.
- 572 18. C. H. Wu, S. C. Tang, P. H. Wang, H. Lee and J. L. Ko, *J Biol Chem*, 2012, **287**, 25292-25302.

- 573 19. W. Lv, L. L. Sui, X. N. Yan, H. Y. Xie, L. P. Jiang, C. Y. Geng, Q. J. Li, X. F. Yao, Y. Kong and J. Cao,  
574 *Chem-Biol Interact*, 2018, **279**, 136-144.
- 575 20. C. Ninsontia, P. P. Phiboonchaiyanan and P. Chanvorachote, *Cancer Cell Int*, 2016, **16**.
- 576 21. S. H. Jeong, Y. J. Jeon and S. J. Park, *Mol Med Rep*, 2016, **14**, 5148-5154.
- 577 22. J. W. Jiang, K. Wang, Y. Chen, H. N. Chen, E. C. Nice and C. H. Huang, *Signal Transduct Tar*, 2017,  
578 **2**.
- 579 23. A. Horn, I. Vencato, A. J. Bortoluzzi, R. Horner, R. A. N. Silva, B. Spoganicz, V. Drago, H. Terenzi, M.  
580 C. B. de Oliveira, R. Werner, W. Haase and A. Neves, *Inorg Chim Acta*, 2005, **358**, 339-351.
- 581 24. A. Horn, I. Vencato, A. J. Bortoluzzi, V. Drago, M. A. Novak and A. Neves, *J Brazil Chem Soc*, 2006,  
582 **17**, 1584-1593.
- 583 25. C. Fernandes, A. Horn, O. Vieira-da-Motta, V. M. de Assis, M. R. Rocha, L. D. Mathias, E. S. Bull, A.  
584 J. Bortoluzzi, E. V. Guimaraes, J. C. A. Almeida and D. H. Russell, *J Inorg Biochem*, 2010, **104**, 1214-  
585 1223.
- 586 26. A. Horn, A. Neves, I. Vencato, V. Drago, C. Zucco, R. Werner and W. Haase, *J Brazil Chem Soc*, 2000,  
587 **11**, 7-10.
- 588 27. A. Horn, L. Firn, A. J. Bortoluzzi, B. Szpoganicz, M. D. Silva, M. A. Novak, M. B. Neto, L. S. Eberlin,  
589 R. R. Catharino, M. N. Eberlin and C. Fernandes, *J Mol Struct*, 2006, **797**, 154-164.
- 590 28. J. Fan, Y. W. Ou, C. Y. Wu, C. J. Yu, Y. M. Song and Q. M. Zhan, *Acta Pharmacol Sin*, 2012, **33**, 1301-  
591 1310.
- 592 29. T. D. Ribeiro, F. L. Fonseca, M. D. C. de Carvalho, R. M. D. Godinho, F. P. de Almeida, T. D.  
593 Saint'Pierre, N. A. Rey, C. Fernandes, A. Horn and M. D. Pereira, *Biochem J*, 2017, **474**, 301-315.
- 594 30. K. A. Mapuskar, C. M. Anderson, D. R. Spitz, I. Batinic-Haberle, B. G. Allen and R. E. Oberley-  
595 Deegan, *Semin Radiat Oncol*, 2019, **29**, 72-80.
- 596 31. F. De Lazzari, L. Bubacco, A. J. Whitworth and M. Bisaglia, *Aging Dis*, 2018, **9**, 716-728.
- 597 32. I. Batinic-Haberle, A. Tovmasyan and I. Spasojevic, *Redox Biol*, 2015, **6**, 656-656.
- 598 33. T. P. Ribeiro, C. Fernandes, K. V. Melo, S. S. Ferreira, J. A. Lessa, R. W. A. Franco, G. Schenk, M. D.  
599 Pereira and A. Horn, *Free Radical Bio Med*, 2015, **80**, 67-76.
- 600 34. R. O. Costal, S. S. Ferreira, C. A. Pereira, J. R. Harmer, C. J. Noble, G. Schenk, R. W. A. Franco, J. A.  
601 L. C. Resende, P. Comba, A. E. Roberts, C. Fernandes and A. Horn, *Front Chem*, 2018, **6**.
- 602 35. A. Horn, G. L. Parrilha, K. V. Melo, C. Fernandes, M. Horner, L. D. Visentin, J. A. S. Santos, M. S.  
603 Santos, E. C. A. Eleutherio and M. D. Pereira, *Inorg Chem*, 2010, **49**, 1274-1276.
- 604 36. I. Batinic-Haberle, J. S. Reboucas and I. Spasojevic, *Antioxidants & redox signaling*, 2010, **13**, 877-  
605 918.
- 606 37. R. Bonetta, *Chem-Eur J*, 2018, **24**, 5032-+.
- 607 38. U. Weser and L. M. Schubotz, *J Mol Catal*, 1981, **13**, 249-261.
- 608 39. J. Switala and P. C. Loewen, *Arch Biochem Biophys*, 2002, **401**, 145-154.
- 609 40. B. Kalyanaraman, V. Darley-Usmar, K. J. A. Davies, P. A. Dennerly, H. J. Forman, M. B. Grisham, G.  
610 E. Mann, K. Moore, L. J. Roberts and H. Ischiropoulos, *Free Radical Bio Med*, 2012, **52**, 1-6.
- 611 41. S. Tuncer, R. Gurbanov, I. Sheraj, E. Solel, O. Esenturk and S. Banerjee, *Sci Rep-Uk*, 2018, **8**.
- 612 42. J. Lu and A. Holmgren, *Free Radical Bio Med*, 2014, **66**, 75-87.
- 613 43. Z. Liao, D. Chua and N. S. Tan, *Molecular cancer*, 2019, **18**, 65.
- 614 44. E. H. Verbon, J. A. Post and J. Boonstra, *Gene*, 2012, **511**, 1-6.
- 615 45. G. K. Schwartz and M. A. Shah, *J Clin Oncol*, 2005, **23**, 9408-9421.
- 616 46. T. Ishiguro, H. Ohata, A. Sato, K. Yamawaki, T. Enomoto and K. Okamoto, *Cancer Sci*, 2017, **108**,  
617 283-289.
- 618 47. S. Nath and G. R. Devi, *Pharmacol Therapeut*, 2016, **163**, 94-108.
- 619 48. M. Wank, D. Schilling, T. E. Schmid, B. Meyer, J. Gempt, M. Barz, J. Schlegel, F. Liesche, K. A. Kessel,  
620 B. Wiestler, S. Bette, C. Zimmer and S. E. Combs, *Cancers*, 2018, **10**.

621 49. A. Bansal and M. C. Simon, *J Cell Biol*, 2018, **217**, 2291-2298.  
622 50. M. Grau, F. Rigodanza, A. J. P. White, A. Soraru, M. Carraro, M. Bonchio and G. J. P. Britovsek,  
623 *Chem Commun*, 2014, **50**, 4607-4609.  
624 51. G. N. Ledesma, H. Eury, E. Anxolabehere-Mallart, C. Hureau and S. R. Signorella, *J Inorg Biochem*,  
625 2015, **146**, 69-76.  
626 52. R. F. Beers and I. W. Sizer, *J Biol Chem*, 1952, **195**, 133-140.  
627 53. J. P. N. Ribeiro, M. A. Segundo, S. Reis and J. L. F. C. Lima, *Talanta*, 2009, **79**, 1169-1176.  
628 54. C. Moriconi, V. Palmieri, R. Di Santo, G. Tornillo, M. Papi, G. Pilkington, M. De Spirito and M.  
629 Gumbleton, *Biotechnol J*, 2017, **12**.

630

631
